# Supplementary material for: Global chocolate supply is limited by low pollination and high temperatures
Source: Springer Nature journal article supplement (doi:10.1038/s43247-025-02072-z), 2025-02-14
Supplement: MOESM2 [file 43247_2025_2072_MOESM2_ESM.pdf › 43247_2025_2072_MOESM2_ESM.pdf]

## Supplementary information

### **Title: Global chocolate supply is limited by low pollination and high temperatures**

#### **Authors:**

Tonya A. Lander<sup>1</sup>, Acheampong Atta-Boateng<sup>2</sup>, Manuel Toledo-Hernández<sup>3,4,5</sup>, Andrew Wood<sup>1</sup>,  
Yadvinder Malhi<sup>2,6</sup>, Mirco Solé<sup>7</sup>, Teja Tschardt<sup>8</sup>, Thomas Cherico Wanger<sup>3,4,5,9\*</sup>

#### **Affiliations:**

<sup>1</sup> Department of Biology, University of Oxford; Oxford UK.

<sup>2</sup> Environmental Change Institute, School of Geography and Environment, University of Oxford; Oxford, U.K.

<sup>3</sup> Sustainable Agricultural Systems and Engineering Laboratory, School of Engineering, Westlake University; Hangzhou, China.

<sup>4</sup> Key Laboratory of Coastal Environment and Resources of Zhejiang Province, Westlake University; Hangzhou, China.

<sup>5</sup> GlobalAgroforestryNetwork.com; Hangzhou, China.

<sup>6</sup> Leverhulme Centre for Nature Recovery, University of Oxford; Oxford, U.K.

<sup>7</sup> Department of Biological Sciences, Universidade Estadual de Santa Cruz; Ilhéus, Brazil.

<sup>8</sup> Functional Agrobiodiversity and Agroecology, Department of Crop Sciences, University of Göttingen; Göttingen, Germany.

<sup>9</sup> Production Technology & Cropping Systems Group, Department of Plant Production, AgroScope, Nyon, Switzerland

\*Corresponding author. Email: tomcwanger@gmail.com



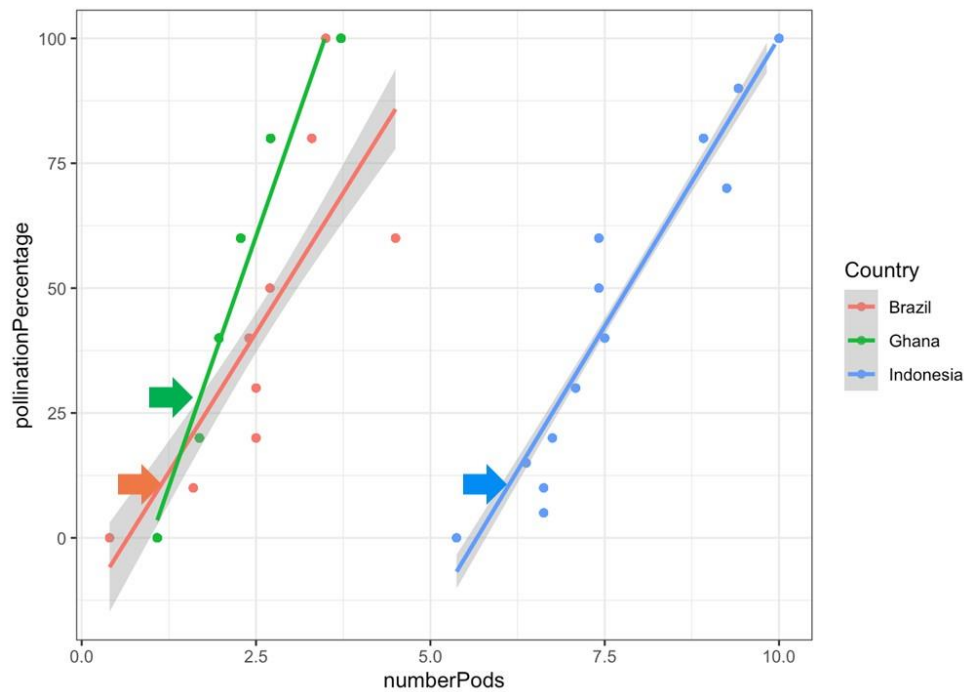

**Supplementary Figure 1:** The standard curves of number of pods harvested against hand pollination percentage was generated using generalised linear models (GLM) with zero-inflated log-linked Poisson error structure ( $R^2 = 0.74$ ). The model was then used to estimate number of pods as a function of pollination percentage. Country was included as a fixed effect (pollinationPercentage ~ numberPods+Country). The amount of natural pollination that occurred at the study sites is the point along the fitted line at which the observed number of pods from the zero-percent hand pollination treatment is located, indicated by the arrows.

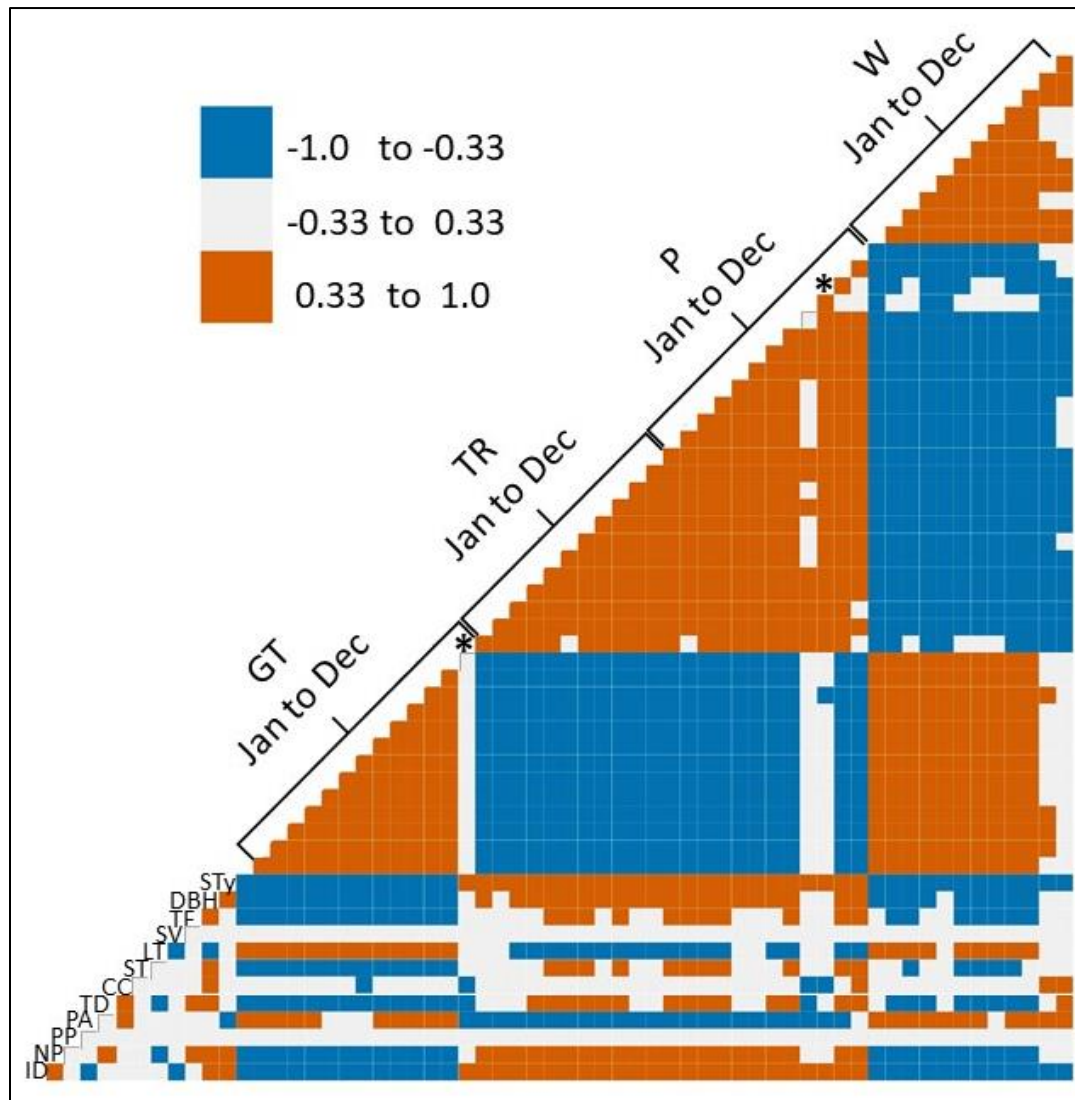

**Supplementary Figure 2:** Pearson correlation between the variables used in Models 1-3.

Orange represents positive correlation  $\geq 0.33$ , blue represents negative correlation  $\leq -0.33$ , white represents low correlation: between 0.33 and -0.33. W = wind, P = precipitation, TR = temperature range, GT = ground temperature, Sty = soil type, DBH = diameter at breast height, TF = total flowers, SV = surrounding vegetation, LT = litter thickness, ST = shade trees, CC = canopy cover, TD = tree density, PA = plantation age, PP = pollination percentage, NP = number of pods, ID = tree identity. ‘\*’ indicates ground temperature in December, and precipitation in September, which were included in Models 1-3.

**Supplementary Table 1: Estimates of achieved cocoa yield,  $Y_a$ , potential yield,  $Y_p$ , and theoretical yield,  $Y_t$ , in major cocoa-producing countries, from a literature review** Sources: 1, 2, 3, 4, 5, 6, 7, 8. Yield gap was calculated as the difference between the averages of reported  $Y_a$  and  $Y_p$  values for each country. A negative yield gap indicates reported ‘potential yields’ are lower than reported achieved yields. Yield gap/ $Y_a$  shows the size of the yield gap relative to  $Y_a$ ; a value of 1.0 indicates that the yield gap, the gap between  $Y_a$  and  $Y_p$  expressed as kg/ha pods, is the same value as the currently achieved yield ( $Y_a$ ). ‡<http://data.un.org/>.

| Country             | % global cocoa production, 2020‡ | $Y_a$ (kg/ha)      | $Y_p$ (kg/ha)     | $Y_t$ (kg/ha)                   | Yield gap (yield gap/ $Y_a$ ) |
|---------------------|----------------------------------|--------------------|-------------------|---------------------------------|-------------------------------|
| Brazil              | 4.9                              | 400; 458           | 350-390; 800      | 3000                            | 84 (0.20)                     |
| Cameroon            | 5.2                              | 418                | 410-550           | --                              | 62 (0.15)                     |
| Columbia            | 1.1                              | 337                | 460-790           | --                              | 288 (0.85)                    |
| Côte d’Ivoire       | 39.8                             | 460                | 840-1000          | --                              | 460 (1.00)                    |
| Dominican Republic  | 1.4                              | 449                | 360               | --                              | -89 (n/a)                     |
| Ecuador             | 5.9                              | 621                | 260-360           | --                              | -311 (n/a)                    |
| Ghana               | 14.5                             | 300-400; 551; 2331 | 380-510; 800-3000 | 970; 5000; 1891-3500; 4178-6567 | 277 (0.31)                    |
| Indonesia           | 13.4                             | 39-3586; 467       | 430-1000; 3600    | --                              | 313 (0.23)                    |
| Nigeria             | 6.1                              | 270                | 320-620           | --                              | 200 (0.74)                    |
| Peru                | 2.9                              | 937                | 580-860           | --                              | -217 (n/a)                    |
| ~48 other countries | 4.8                              | --                 | --                | --                              | --                            |

**Supplementary Table 2: Study sites.** Private plantation owners/managers are anonymized as ‘A’-‘J’, with owner ‘A’ managing multiple sites in Ghana. In Indonesia the farms were each owned by separate small-scale producers, but from one month before data collection started until the end of the experiments, the farmers agreed not to apply agrichemicals to the study sites to improve comparability across sites (see <sup>9</sup>). ‘Mean dbh’ is the average diameter at breast height (dbh) of all trees within 2m either side of a diagonal transect of the study plot. Canopy cover is percent canopy cover measured below the cocoa canopy: L (low = 0-39%) or H (high = 40-100%). ‘Shade trees’ is a binary indication of the presence or absence of non-cocoa shade trees within the cocoa plantation. ‘Veg’ is a binary classification of neighbouring land-use: S (simple: farm, single species plantation, or grass field), or C (complex: high floral diversity, primary or secondary forest or wetland). ‘Mean pods/tree, open poll’ is the average number of pods per tree in the natural pollination treatment. ‘Mean pods/tree, all poll’ is the average number of pods per tree in all of the pollination treatments combined, including natural pollination.

| ID | Site                 | Latitude | Longitude | Study years | Plantation owner/<br>manager | Cocoa variety    | Mean dbh (cm) | Mean annual temp. (°C) | Mean tree age | Tree density (trees/ha) | Canopy cover (L/H) | Shade trees (Y/N) | Veg (C/S) | Litter depth (cm) | Mean pods/ tree, open poll | Mean pods/ tree, all poll |
|----|----------------------|----------|-----------|-------------|------------------------------|------------------|---------------|------------------------|---------------|-------------------------|--------------------|-------------------|-----------|-------------------|----------------------------|---------------------------|
| 1  | Brazil, Ilhéus       | -14.6711 | -39.1886  | 2018-19     | Fazenda Almada               | <i>parazinho</i> | 40.11         | 24.00                  | 90            | 800                     | L                  | Y                 | C         | 3.80              | 1.00                       | 4.89                      |
| 2  | Brazil, Ilhéus       | -14.6722 | -39.1902  | 2018-19     | Fazenda Almada               | <i>parazinho</i> | 30.88         | 24.00                  | 90            | 800                     | L                  | Y                 | C         | 3.40              | 1.00                       | 3.56                      |
| 3  | Brazil, Ilhéus       | -14.6717 | 39.1902   | 2018-19     | Fazenda Almada               | <i>parazinho</i> | 38.71         | 24.00                  | 90            | 800                     | L                  | Y                 | C         | 3.80              | 0.00                       | 3.44                      |
| 4  | Brazil, Ilhéus       | -14.6717 | -39.1925  | 2018-19     | Fazenda Almada               | <i>parazinho</i> | 37.74         | 24.00                  | 90            | 800                     | L                  | Y                 | C         | 3.40              | 1.00                       | 4.67                      |
| 5  | Brazil, Ilhéus       | -14.6736 | -39.1939  | 2018-19     | Fazenda Almada               | <i>parazinho</i> | 35.37         | 24.00                  | 90            | 800                     | L                  | Y                 | C         | 2.80              | 1.00                       | 3.33                      |
| 6  | Brazil, Ilhéus       | -14.6721 | -39.1897  | 2018-19     | Fazenda Almada               | <i>parazinho</i> | 34.90         | 24.00                  | 90            | 800                     | H                  | Y                 | C         | 3.80              | 0.00                       | 2.11                      |
| 7  | Brazil, Ilhéus       | -14.6725 | -39.1914  | 2018-19     | Fazenda Almada               | <i>parazinho</i> | 32.73         | 24.00                  | 90            | 800                     | H                  | Y                 | C         | 4.20              | 0.00                       | 0.67                      |
| 8  | Brazil, Ilhéus       | -14.6725 | -39.1925  | 2018-19     | Fazenda Almada               | <i>parazinho</i> | 32.82         | 24.00                  | 90            | 800                     | H                  | Y                 | C         | 3.50              | 0.00                       | 0.44                      |
| 9  | Brazil, Ilhéus       | -14.6717 | -39.1942  | 2018-19     | Fazenda Almada               | <i>parazinho</i> | 47.02         | 24.00                  | 90            | 800                     | H                  | Y                 | C         | 4.10              | 0.00                       | 1.22                      |
| 10 | Brazil, Ilhéus       | -14.6736 | -39.1939  | 2018-19     | Fazenda Almada               | <i>parazinho</i> | 27.07         | 24.00                  | 90            | 800                     | H                  | Y                 | C         | 3.40              | 0.00                       | 1.67                      |
| 11 | Ghana, Tarkwa-Breman | 5.56173  | -2.14415  | 2019-20     | Private owner A              | <i>Amelorado</i> | 10.61         | 25.82                  | 39            | 440                     | L                  | Y                 | C         | 5.32              | 0.75                       | 1.40                      |
| 12 | Ghana, Tarkwa-Breman | 5.56226  | -2.14443  | 2019-20     | Private owner A              | <i>Amelorado</i> | 11.01         | 25.82                  | 39            | 329                     | L                  | N                 | C         | 5.99              | 0.58                       | 1.49                      |
| 13 | Ghana, Tarkwa-Breman | 5.56373  | -2.14393  | 2019-20     | Private owner A              | <i>Amelorado</i> | 13.05         | 25.82                  | 39            | 206                     | L                  | Y                 | C         | 5.44              | 0.92                       | 2.63                      |
| 14 | Ghana, Tarkwa-Breman | 5.56466  | -2.14400  | 2019-20     | Private owner A              | <i>Amelorado</i> | 12.95         | 25.82                  | 39            | 212                     | L                  | N                 | S         | 6.52              | 1.92                       | 2.56                      |

|                              |          |          |         |                    |                           |       |       |    |      |   |   |   |      |       |      |
|------------------------------|----------|----------|---------|--------------------|---------------------------|-------|-------|----|------|---|---|---|------|-------|------|
| Ghana, Tarkwa-<br>15 Breman  | 5.56216  | -2.14347 | 2019-20 | Private owner<br>A | Amelorado                 | 10.98 | 25.82 | 39 | 308  | L | Y | S | 6.84 | 0.83  | 1.82 |
| Ghana, Anti-<br>16 korkoh    | 5.54138  | -2.14485 | 2019-20 | cocoa360.org       | Amelorado                 | 12.76 | 25.67 | 39 | 178  | L | N | S | 6.40 | 2.25  | 3.39 |
| Ghana, Anti-<br>17 korkoh    | 5.54263  | -2.14585 | 2019-20 | cocoa360.org       | Amelorado                 | 12.39 | 25.67 | 39 | 184  | L | Y | S | 6.08 | 0.33  | 1.75 |
| Ghana, Amezugbe<br>18        | 5.54383  | -2.15915 | 2019-20 | Private owner<br>B | Amelorado                 | 13.17 | 25.67 | 39 | 386  | H | N | C | 6.69 | 1.08  | 2.90 |
| Indonesia, Napu<br>19 Valley | -1.38453 | -1.38453 | 2017    | Private owner<br>C | Trinitario x<br>Forastero | 59.00 | 18.97 | 10 | 493  | L | Y | S | 4.50 | 5.00  | 6.47 |
| Indonesia, Napu<br>20 Valley | -1.38553 | 120.3177 | 2017    | Private owner<br>D | Trinitario x<br>Forastero | 51.80 | 18.97 | 15 | 577  | L | Y | C | 2.30 | 5.00  | 8.31 |
| Indonesia, Napu<br>21 Valley | -1.44574 | 120.3076 | 2017    | Private owner<br>E | Trinitario x<br>Forastero | 44.60 | 18.97 | 15 | 882  | L | N | S | 2.96 | 10.00 | 9.33 |
| Indonesia, Napu<br>22 Valley | -1.3875  | 120.3126 | 2017    | Private owner<br>F | Trinitario x<br>Forastero | 46.65 | 18.97 | 12 | 1065 | H | N | S | 2.60 | 3.00  | 6.41 |
| Indonesia, Napu<br>23 Valley | -1.43885 | 120.3082 | 2017    | Private owner<br>G | Trinitario x<br>Forastero | 46.65 | 18.97 | 19 | 777  | H | Y | S | 2.20 | 5.00  | 9.18 |
| Indonesia, Napu<br>24 Valley | -1.43224 | 120.3370 | 2017    | Private owner<br>H | Trinitario x<br>Forastero | 50.60 | 18.97 | 12 | 1000 | L | Y | S | 3.10 | 4.00  | 6.65 |
| Indonesia, Napu<br>25 Valley | -1.42341 | 120.3369 | 2017    | Private owner<br>I | Trinitario x<br>Forastero | 46.65 | 18.97 | 13 | 900  | L | N | C | 1.10 | 5.00  | 9.12 |
| Indonesia, Napu<br>26 Valley | -1.44625 | 120.3249 | 2017    | Private owner<br>J | Trinitario x<br>Forastero | 42.70 | 18.97 | 13 | 412  | H | N | C | 1.10 | 6.00  | 6.71 |

**Supplementary Table 3: The breakpoint regression (SETAR) models outputs.** These models are two coupled linear models which aim to find the plateau ('breakpoint') of a dataset where two lines provide a better fit for the data than one line. The presence of a break point would suggest physiological limitation on pod production. As these are linear models, nonlinearity is not captured. The total AIC value is the sum of the AIC values of the linear models either side of the break point. The breakpoint for each country is the % hand pollination value with the lowest total AIC, indicated by '\*'. Brazil and Ghana have a 'breakpoint' of 0, which is equivalent to no breakpoint. The analyses also included a null model (no breakpoint), tested by comparing the AIC score between the break point models and the null model.

| <b>% hand<br/>pollination</b> | <b>AIC Segment 1</b> | <b>DF</b> | <b>AIC Segment 2</b> | <b>DF</b> | <b>Total AIC</b> |
|-------------------------------|----------------------|-----------|----------------------|-----------|------------------|
| <b>Brazil</b>                 |                      |           |                      |           |                  |
| * 0                           | 18.10761             | 9         | 406.1588             | 88        | 424.2664         |
| 20                            | 112.6471             | 28        | 327.8611             | 68        | 440.5082         |
| 40                            | 205.1909             | 48        | 242.1714             | 48        | 447.3623         |
| 60                            | 311.9705             | 68        | 146.8825             | 28        | 458.853          |
| 80                            | 361.3126             | 78        | 95.45965             | 18        | 456.7722         |
| 100                           | 406.1588             | 88        | 46.84796             | 9         | 453.0067         |
| <b>Ghana</b>                  |                      |           |                      |           |                  |
| * 0                           | 419.7849             | 95        | 2814.868             | 574       | 3234.653         |
| 20                            | 855.8337             | 190       | 2385.46              | 478       | 3241.294         |
| 40                            | 1301.74              | 286       | 1941.728             | 382       | 3243.468         |
| 60                            | 1772.434             | 382       | 1487.859             | 286       | 3260.292         |
| 80                            | 2275.299             | 478       | 1016.403             | 190       | 3291.702         |
| 100                           | 2814.868             | 574       | 521.2303             | 95        | 3336.098         |
| <b>Indonesia</b>              |                      |           |                      |           |                  |
| 0                             | 37.24366             | 7         | 541.3121             | 134       | 578.5558         |
| 20                            | 141.9568             | 38        | 427.4351             | 102       | 569.392          |
| 40                            | 218.8621             | 62        | 357.3268             | 82        | 576.1889         |
| * 60                          | 298.8327             | 86        | 267.3704             | 58        | 566.2031         |
| 80                            | 419.0291             | 110       | 168.7714             | 34        | 587.8005         |
| 100                           | 541.3121             | 134       | 56.10345             | 11        | 597.4156         |



**Supplementary Table 4: Results for Models 1-3. Model 1:** natural pollination (0% hand pollination) data from all countries. This model tests whether tree, plantation, or climate factors explain patterns of natural pollination and pod production. **Model 2:** 100% hand pollination data from all countries. This model tests whether tree, plantation, or climate factors explain pod production when there is no pollination limitation. **Model 3:** Data from all countries and all hand-pollination treatments except the 0%, natural pollination, treatment, was used to understand the relative impact of cocoa tree, plantation, or climate factors compared to known levels of pollination on pod production. Model 1, 2 or 3 plus ‘:AIC’ indicates the AIC-selected model for Models 1, 2 or 3. Number of pods (‘pods’) was the dependent variable for all of the models. ‘dbh’ is diameter at breast height (1.3m above ground). ‘PlantationAge’ is the average age of the cocoa trees in the plantation. ‘shade’ is a binary variable indicating presence or absence of non-cocoa shade trees. ‘density’ is cocoa tree density within the plantation. ‘litter’ is litter depth on the plantation floor. ‘ground.temp.Dec’ is temperature at 2m above ground surface in the plantation in December during the study year. ‘precip.Sept’ is precipitation in the plantation in September. ‘pollination’ is percent hand pollination. Significance codes: <0.001 ‘\*\*\*’, 0.001 ‘\*\*’, 0.01 ‘\*’.

| Model                                                                                             | Null dev (DF) | Res dev (DF) | R <sup>2</sup> | AIC    | ΔAIC |
|---------------------------------------------------------------------------------------------------|---------------|--------------|----------------|--------|------|
| 1<br>pods ~ dbh + age + shade + density + litter +<br>ground.temp.Dec + precip.Sept               | 385.35 (113)  | 296.14 (106) | 0.2314         | 449.72 | --   |
| 1:AIC<br>pods ~ age + shade + density + ground.temp.Dec                                           | --            | 297.39 (109) | 0.2282         | 444.96 | 4.76 |
| 2<br>pods ~ dbh + age + shade + density + litter +<br>ground.temp.Dec + precip.Sept               | 437.46 (117)  | 346.61 (110) | 0.2076         | 680.14 | --   |
| 2:AIC<br>pods ~ shade + density + ground.temp.Dec                                                 | --            | 349.39 (114) | 0.2013         | 674.92 | 5.22 |
| 3<br>pods ~ pollination + dbh + age + shade + density + litter +<br>ground.temp.Dec + precip.Sept | 612.8 (687)   | 1760.3 (679) | 0.3263         | 3400   | --   |
| 3:AIC<br>pods ~ pollination + dbh + shade + density + litter +<br>ground.temp.Dec                 | --            | 1761.9 (681) | 0.3256         | 3397.7 | 2.30 |
| <b>Model results details</b>                                                                      |               |              |                |        |      |
| <b>Model 1: Open pollination, 0% hand pollination</b>                                             |               |              |                |        |      |
| pods ~ dbh + age + shade + density + litter + ground.temp.Dec + precip.Sept                       |               |              |                |        |      |

|                                      | Min      | 1Q         | Median  | 3Q       | Max    |
|--------------------------------------|----------|------------|---------|----------|--------|
| Deviance residuals                   | -2.5891  | -1.5798    | -1.1346 | 0.4244   | 4.9874 |
| Coefficients:                        | Estimate | Std. Error | t value | Pr(> t ) | Sig.   |
| (Intercept)                          | 11.4523  | 4.5345     | 2.5260  | 0.0116   | *      |
| dbh                                  | -0.0208  | 0.0230     | -0.9060 | 0.3652   |        |
| PlantationAge                        | 0.0132   | 0.0613     | 0.2150  | 0.8297   |        |
| Shadetrees                           | 0.7772   | 0.2193     | 3.5440  | 0.0004   | ***    |
| LitterThickness                      | -0.0214  | 0.1027     | -0.2080 | 0.8350   |        |
| treedensity                          | -0.0014  | 0.0006     | -2.2710 | 0.0232   | *      |
| groundtempDec                        | -0.4026  | 0.2450     | -1.6430 | 0.1003   |        |
| precipSep                            | -0.1064  | 0.2386     | -0.4460 | 0.6557   |        |
| Null deviance (DF): 385.35 (113)     |          |            |         |          |        |
| Residual deviance (DF): 296.14 (106) |          |            |         |          |        |
| AIC: 449.72                          |          |            |         |          |        |
| R <sup>2</sup> : 0.2314              |          |            |         |          |        |

**Model 1 AIC selected (Model 1 in Figure 2): Open pollination, 0% hand pollination**

pods ~ age + shade + density + ground.temp.Dec

|                                      | Min      | 1Q         | Median  | 3Q       | Max    |
|--------------------------------------|----------|------------|---------|----------|--------|
| Deviance residuals                   | -2.442   | -1.6159    | -1.136  | 0.4926   | 4.9071 |
| Coefficients:                        | Estimate | Std. Error | t value | Pr(> t ) | Sig.   |
| (Intercept)                          | 8.6122   | 1.6524     | 5.2120  | 0.0000   | ***    |
| PlantationAge                        | 0.0317   | 0.0106     | 2.9960  | 0.0027   | **     |
| shade                                | 0.7548   | 0.1966     | 3.8390  | 0.0001   | ***    |
| treedensity                          | -0.0013  | 0.0006     | -2.2230 | 0.0262   | *      |
| groundtempDec                        | -0.3717  | 0.0701     | -5.3060 | 0.0000   | ***    |
| Null deviance (DF): 385.35 (113)     |          |            |         |          |        |
| Residual deviance (DF): 297.39 (109) |          |            |         |          |        |
| AIC: 444.96                          |          |            |         |          |        |
| R <sup>2</sup> : 0.2282              |          |            |         |          |        |

**Model 2: Full pollination, 100% hand pollination**

pods ~ dbh + age + shade + density + litter + ground.temp.Dec + precip.Sept

|                    | Min      | 1Q         | Median  | 3Q       | Max    |
|--------------------|----------|------------|---------|----------|--------|
| Deviance residuals | -3.0203  | -1.4004    | -0.2995 | 0.7762   | 4.9151 |
| Coefficients:      | Estimate | Std. Error | t value | Pr(> t ) | Sig.   |
| (Intercept)        | 2.7815   | 3.8031     | 0.7310  | 0.4645   |        |
| dbh                | 0.0215   | 0.0199     | 1.0770  | 0.2813   |        |
| PlantationAge      | -0.0085  | 0.0362     | -0.2360 | 0.8135   |        |
| Shadetrees         | 0.2047   | 0.1152     | 1.7770  | 0.0756   |        |
| LitterThickness    | 0.0546   | 0.0577     | 0.9470  | 0.3439   |        |
| treedensity        | -0.0007  | 0.0006     | -1.0870 | 0.2772   |        |
| groundtempDec      | -0.0767  | 0.1564     | -0.4910 | 0.6237   |        |

|                                      |        |        |        |        |
|--------------------------------------|--------|--------|--------|--------|
| precipSep                            | 0.0449 | 0.1449 | 0.3100 | 0.7564 |
| Null deviance (DF): 437.46 (117)     |        |        |        |        |
| Residual deviance (DF): 346.61 (110) |        |        |        |        |
| AIC: 680.14                          |        |        |        |        |
| R <sup>2</sup> : 0.2076              |        |        |        |        |

**Model 2 AIC selected (Model 2 in Figure 2): Full pollination, 100% hand pollination**

|                                          |          |            |         |          |        |
|------------------------------------------|----------|------------|---------|----------|--------|
| pods ~ shade + density + ground.temp.Dec |          |            |         |          |        |
|                                          | Min      | 1Q         | Median  | 3Q       | Max    |
| Deviance residuals                       | -3.0911  | -1.4963    | -0.3541 | 0.8039   | 5.0469 |
| Coefficients:                            | Estimate | Std. Error | t value | Pr(> t ) | Sig.   |
| (Intercept)                              | 7.4873   | 1.1433     | 6.5490  | 0.0000   | ***    |
| Shadetrees                               | 0.2500   | 0.1036     | 2.4140  | 0.0158   | *      |
| density                                  | -0.0013  | 0.0004     | -2.8900 | 0.0039   | **     |
| ground.temp.Dec                          | -0.2253  | 0.0387     | -5.8150 | 0.0000   | ***    |
| Null deviance (DF): 437.46 (117)         |          |            |         |          |        |
| Residual deviance (DF): 349.39 (114)     |          |            |         |          |        |
| AIC: 674.92                              |          |            |         |          |        |
| R <sup>2</sup> of this model is: 0.2013  |          |            |         |          |        |

**Model 3: Pollination gradient, 20-100% hand pollination**

|                                                                                           |          |            |         |          |        |
|-------------------------------------------------------------------------------------------|----------|------------|---------|----------|--------|
| pods ~ pollination + dbh + age + shade + density + litter + ground.temp.Dec + precip.Sept |          |            |         |          |        |
|                                                                                           | Min      | 1Q         | Median  | 3Q       | Max    |
| Deviance residuals                                                                        | -2.8697  | -1.7429    | -0.3592 | 0.6001   | 5.6455 |
| Coefficients:                                                                             | Estimate | Std. Error | t value | Pr(> t ) | Sig.   |
| (Intercept)                                                                               | 2.9115   | 1.1032     | 2.6390  | 0.0083   | **     |
| pollinationPercentage                                                                     | 0.0082   | 0.0008     | 10.2820 | 0.0000   | ***    |
| dbh                                                                                       | 0.0171   | 0.0052     | 3.2690  | 0.0011   | **     |
| PlantationAge                                                                             | 0.0105   | 0.0132     | 0.7940  | 0.4270   |        |
| Shadetrees                                                                                | 0.1573   | 0.0584     | 2.6930  | 0.0071   | **     |
| LitterThickness                                                                           | 0.0480   | 0.0237     | 2.0220  | 0.0432   | *      |
| treedensity                                                                               | -0.0002  | 0.0001     | -1.6380 | 0.1014   |        |
| groundtempDec                                                                             | -0.1494  | 0.0538     | -2.7790 | 0.0055   | **     |
| precipSep                                                                                 | 0.0596   | 0.0540     | 1.1020  | 0.2705   |        |
| Null deviance (DF): 2612.8 (687)                                                          |          |            |         |          |        |
| Residual deviance (DF): 1760.3 (679)                                                      |          |            |         |          |        |
| AIC: 3400                                                                                 |          |            |         |          |        |
| R <sup>2</sup> of this model is: 0.3263                                                   |          |            |         |          |        |

**Model 3 AIC selected (Model 3 in Figure 2): Pollination gradient, 20-100% hand pollination**

|                                                                       |     |    |        |    |     |
|-----------------------------------------------------------------------|-----|----|--------|----|-----|
| pods ~ pollination + dbh + shade + density + litter + ground.temp.Dec |     |    |        |    |     |
|                                                                       | Min | 1Q | Median | 3Q | Max |

| Deviance residuals                      | -2.9666  | -1.7112    | -0.3526 | 0.6091   | 5.6819 |
|-----------------------------------------|----------|------------|---------|----------|--------|
| Coefficients:                           | Estimate | Std. Error | t value | Pr(> t ) | Sig.   |
| (Intercept)                             | 3.7988   | 0.4862     | 7.8130  | 0.0000   | ***    |
| pollinationPercentage                   | 0.0084   | 0.0007     | 11.4290 | 0.0000   | ***    |
| dbh                                     | 0.0123   | 0.0032     | 3.8580  | 0.0001   | ***    |
| Shadetrees                              | 0.1530   | 0.0572     | 2.6750  | 0.0075   | **     |
| LitterThickness                         | 0.0592   | 0.0203     | 2.9170  | 0.0035   | **     |
| treedensity                             | -0.0003  | 0.0001     | -2.0760 | 0.0379   | *      |
| groundtempDec                           | -0.1486  | 0.0175     | -8.4740 | 0.0000   | ***    |
| Null deviance (DF): 2612.8 (687)        |          |            |         |          |        |
| Residual deviance (DF): 1761.9 (681)    |          |            |         |          |        |
| AIC: 3397.7                             |          |            |         |          |        |
| R <sup>2</sup> of this model is: 0.3256 |          |            |         |          |        |

**Supplementary Table 5:** Estimates of percent change in pod production driven by each of the variables found to be significant in the AIC selected models for Models 1-3. ‘HP’ is hand

pollination. †Average pods / tree is the average number of pods produced below 2m on the trees in this treatment. This value is estimated to represent 13% of pod production on the whole tree (see Methods). ‡Percent change in number of pods between the maximum and minimum value for the variable of interest in each model was calculated as:  $(\text{model variable estimate} / |\text{model intercept}|) * (\text{variable maximum} - \text{variable minimum}) * 100$ .

| Model | % HP   | Variable                | Variable mean | Variable min. | Variable max. | Average pods / tree † | Model intercept | Model variable estimate | % change in number of pods ‡ |
|-------|--------|-------------------------|---------------|---------------|---------------|-----------------------|-----------------|-------------------------|------------------------------|
| 3     | 20-100 | dbh (cm)                | 20.28         | 7.00          | 65.40         | 3.53                  | 3.7988          | 0.0123                  | 18.8529                      |
| 3     | 20-100 | Litter                  | 4.98          | 1.10          | 6.99          | 3.53                  | 3.7988          | 0.0592                  | 9.1777                       |
| 1     | 0      | Plantation age          | 39.06         | 10.00         | 60.00         | 1.32                  | 8.6122          | 0.0317                  | 18.4167                      |
| 3     | 20-100 | Pollination percentage  | --            | 10            | 100           | 3.53                  | 3.7988          | 0.0084                  | 19.9761                      |
| 1     | 0      | Shadetrees (yes/no)     | binary        | 0             | 1             | 1.32                  | 8.6122          | 0.7548                  | 8.7645                       |
| 2     | 100    | Shadetrees (yes/no)     | binary        | 0             | 1             | 4.34                  | 7.4873          | 0.2500                  | 3.3389                       |
| 3     | 20-100 | Shadetrees (yes/no)     | binary        | 0             | 1             | 3.53                  | 3.7988          | 0.1530                  | 4.0282                       |
| 1     | 0      | Temp. Dec. (°C)         | 25.67         | 19.36         | 26.57         | 1.32                  | 8.6122          | -0.3717                 | -31.1174                     |
| 2     | 100    | Temp. Dec. (°C)         | 25.67         | 19.36         | 26.57         | 4.34                  | 7.4873          | -0.2253                 | -21.6916                     |
| 3     | 20-100 | Temp. Dec. (°C)         | 25.67         | 19.36         | 26.57         | 3.53                  | 3.7988          | -0.1486                 | -28.2059                     |
| 1     | 0      | Tree density (trees/ha) | 349.26        | 178.00        | 1065.00       | 1.32                  | 8.6122          | -0.0013                 | -13.7980                     |
| 2     | 100    | Tree density (trees/ha) | 383.25        | 178.00        | 900.00        | 4.34                  | 7.4873          | -0.0013                 | -12.1376                     |
| 3     | 20-100 | Tree density (trees/ha) | 431.52        | 178.00        | 1065.00       | 3.53                  | 3.7988          | -0.0003                 | -6.2950                      |

## Supplementary References

1. FAO. FAOSTAT. In: <http://faostat.fao.org/>; <http://data.un.org/>. Food And Agriculture Organization Of The United Nations, (2022).
2. Kozicka M, Tacconi FA, Horna D, Gotor E. Forecasting cocoa yields for 2050. In: *Report number: ISBN: 978-92-9255-114-8*. Bioversity International (2018).
3. Zuidema PA, Leffelaar PA, Gerritsma W, Mommer L, Anten NPR. A physiological production model for cocoa (*Theobroma cacao*): model presentation, validation and application. *Agricultural Systems* **84**, 195-225 (2005).
4. Daymond A, *et al.* Variation in Indonesian cocoa farm productivity in relation to management, environmental and edaphic factors. *Experimental Agriculture* **56**, 738-751 (2020).
5. Aneani F, Ofori-Frimpong K. An Analysis of Yield Gap and Some Factors of Cocoa (*Theobroma cacao*) Yields in Ghana. *Sustainable Agriculture Research* **2**, (2013).
6. Appiah M, Ofori-Frimpong K, Afrifa A. Evaluation of fertilizer application on some peasant cocoa farms in Ghana. *Ghana J Agric Sci* **33**, (2000).
7. Obiri BD, Bright GA, McDonald MA, Anglaaere LCN, Cobbina J. Financial analysis of shaded cocoa in Ghana. *Agroforestry Systems* **71**, 139–149 (2007).
8. Asante PA, *et al.* The cocoa yield gap in Ghana: A quantification and an analysis of factors that could narrow the gap. *Agricultural Systems* **201**, 103473 (2022).
9. Toledo-Hernández M, Tschardt T, Tjoa A, Anshary A, Cyio B, Wanger TC. Hand pollination, not pesticides or fertilizers, increases cocoa yields and farmer income. *Agr Ecosyst Environ* **304**, 107160 (2020).
